# Supplementary material
Source: PubMed Central journal article supplement (PMC3329958)
Supplement: s-19-00381-sup1.pdf [file s-19-00381-sup1.pdf]

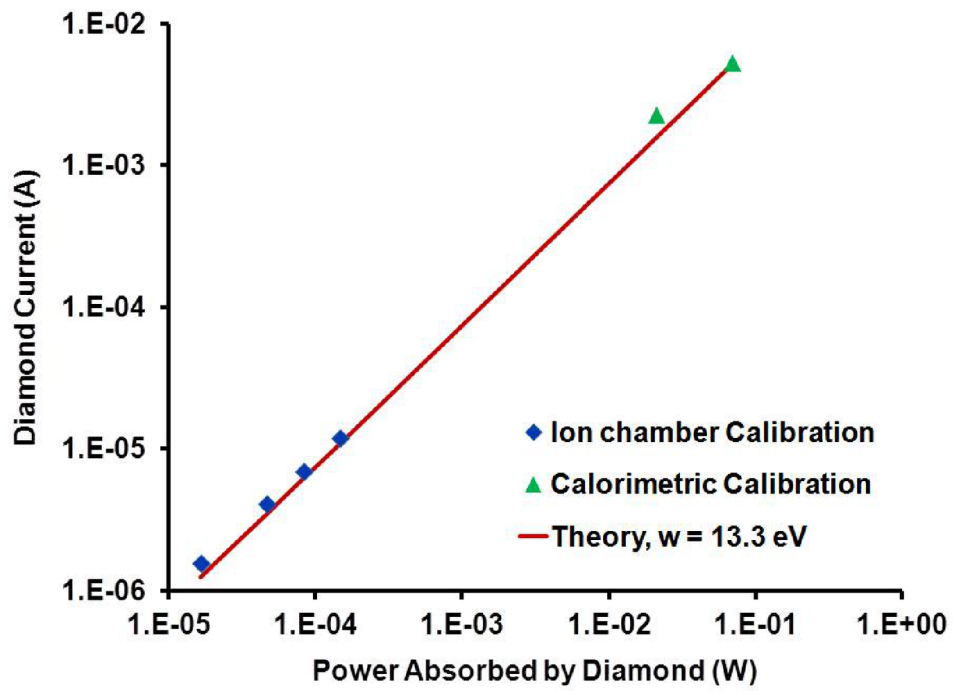

Fig. S1. Linearity test of quad wBPM performed at X28C as described previously (Bohon *et al.*, 2010). Calibration is performed (using -30 V DC bias) against a nitrogen-filled ion chamber at lower fluxes, then using a copper-block calorimeter for the higher flux range.
